# Supplementary material for: Depression prevalence and primary care among vulnerable patients at a free outpatient clinic in Paris, France, in 2010: results of a cross-sectional survey
Source: BMC Fam Pract. 2013 Oct 11;14:151. doi: 10.1186/1471-2296-14-151 (PMC3852793; doi:10.1186/1471-2296-14-151)
Supplement: Additional file 1 — Semistructured interview guide. [file 1471-2296-14-151-S1.pdf]

Additional file 1: Semistructured interview guide

|                                     |                                                                                                                                                                                                                                                                                                                                                      |
|-------------------------------------|------------------------------------------------------------------------------------------------------------------------------------------------------------------------------------------------------------------------------------------------------------------------------------------------------------------------------------------------------|
| Date of interview                   |                                                                                                                                                                                                                                                                                                                                                      |
| Interviewer                         |                                                                                                                                                                                                                                                                                                                                                      |
| Interviewee's sex                   |                                                                                                                                                                                                                                                                                                                                                      |
| Interviewee's age                   |                                                                                                                                                                                                                                                                                                                                                      |
| Interviewee's occupational category |                                                                                                                                                                                                                                                                                                                                                      |
| <b>Theme</b>                        | <b>Questions</b>                                                                                                                                                                                                                                                                                                                                     |
| Perception of depression            | <p>For you, what is depression?</p> <p>How do you perceive this condition?</p> <p>What do you think of depressed people?</p> <p>Do you think that depression is a disease like other diseases?</p> <p>Do you think that depression can be cured?</p> <p>Are you afraid of depression? Why?</p> <p>Do you think that being depressed is shameful?</p> |
| About the interviewee               | <p>Have you ever had depression?</p> <p>Did you talk about depression with the doctor?</p> <p>Did you hesitate to talk about it with the doctor?</p> <p>Why?</p>                                                                                                                                                                                     |
| Treatment of depression             | <p>Who should you talk to in case you are depressed?</p> <p>How could the healthcare system help depressed people?</p> <p>Do you think medications can help in cases of depression? Why?</p>                                                                                                                                                         |
